# Supplementary material for: Effects of microhabitat on rodent-mediated seed removal of endangered Kmeria septentrionalis in the karst habitat
Source: PeerJ. 2020 Nov 16;8:e10378. doi: 10.7717/peerj.10378 (PMC7676351; doi:10.7717/peerj.10378)
Supplement: Supplemental Information 1 [file peerj-08-10378-s001.xlsx]

## Sheet: sheet1
Height(cm)	Altitude(m)	Longitude	Latitude	Microhabitat	Distance from nearest mother tree(m)
8	499	107°58′12.41″	25°3′7.81″	soil suface	0.79
18.3	496	107°58′12.37″	25°3′7.89″	soil suface	0.99
11.3	496	107°58′12.43″	25°3′8.05″	soil suface	1.04
9.4	497	107°58′12.38″	25°3′8.25″	stone groove	1.19
11.4	510	107°58′12.14″	25°3′8.06″	soil suface	0.84
9.7	510	107°58′12.17″	25°3′8.06″	soil suface	0.81
14.3	510	107°58′12.14″	25°3′7.94″	soil suface	0.94
7.2	509	107°58′12.25″	25°3′7.95″	soil suface	1.18
8.7	509	107°58′12.22″	25°3′8.16″	soil suface	1.41
14	508	107°58′12.39″	25°3′8.01″	soil suface	2.71
17.2	509	107°58′12.22″	25°3′8.05″	soil suface	1.58
18.7	509	107°58′12.27″	25°3′8.11″	soil suface	1.49
14	508	107°58′12.31″	25°3′8.08″	soil suface	2.57
8.7	506	107°58′12.36″	25°3′8.03″	soil suface	2.09
17	506	107°58′12.36″	25°3′8.04″	stone groove	1.25
19	507	107°58′12.50″	25°3′8.16″	soil suface	2.55
14	523	107°58′12.49″	25°3′8.15″	soil suface	3.02
16.8	520	107°58′12.39″	25°3′8.15″	soil suface	3.33
12	520	107°58′12.33″	25°3′8.08″	soil suface	1.62
23	520	107°58′12.11″	25°3′8.18″	soil suface	1.96
24.5	521	107°58′12.09″	25°3′8.17″	soil suface	2.95
8.5	519	107°58′12.33″	25°3′8.11″	soil suface	2.57
16.4	519	107°58′12.25″	25°3′8.17″	soil suface	3.07
20.3	519	107°58′12.28″	25°3′8.35″	soil suface	3.48
11.7	519	107°58′12.39″	25°3′8.18″	soil suface	3.53
15.3	513	107°58′12.44″	25°3′8.11″	soil suface	4.65
6.2	516	107°58f′12.45″	25°3′8.20″	soil suface	4.39
5.3	515	107°58′12.39″	25°3′8.21″	soil suface	4.32
32	516	107°58′12.66″	25°3′8.17″	soil suface	4.65
10.8	517	107°58′12.31″	25°3′8.29″	soil suface	2.76
16.2	520	107°58′12.36″	25°3′8.37″	soil suface	3.21
12.7	521	107°58′12.41″	25°3′8.29″	soil suface	3.65
14.2	522	107°58′12.77″	25°3′8.22″	soil suface	3.39
19.4	522	107°58′12.53″	25°3′8.21″	soil suface	2.23
16.2	523	107°581′12.31″	25°3′8.13″	soil suface	3.27
13	522	107°58′12.39″	25°3′8.14″	stone groove	3.35
16.2	522	107°58′12.42″	25°3′8.15″	soil suface	3.71
10.2	522	107°58′12.66″	25°3′8.00″	soil suface	3.24
16.4	523	107°58′12.25″	25°3′7.72″	soil suface	0.86
28.6	524	107°58′12.50″	25°3′7.99″	soil suface	3.37
13	510	107°58′12.36″	25°3′8.13″	soil suface	3.09
17.6	524	107°58′12.39″	25°3′8.13″	soil suface	2.94
34.2	524	107°58′12.53″	25°3′8.24″	soil suface	2.89
43	525	107°58′12.77″	25°3′8.11″	soil suface	1.91
36.8	525	107°58′12.66″	25°3′8.14″	soil suface	2.09
36.4	526	107°58′12.61″	25°3′8.12″	soil suface	0.76
24.3	526	107°58′12.58″	25°3′8.18″	soil suface	1.16
17.3	529	107°58′12.53″	25°3′8.20″	soil suface	1.43
27.2	529	107°58′12.44″	25°3′8.19″	soil suface	2.56
16.3	528	107°58′12.47″	25°3′8.19″	soil suface	5.23
12.3	527	107°58′12.55″	25°3′8.22″	soil suface	2.85
44	520	107°58′12.83″	25°3′8.12″	soil suface	0.89
27	517	107°58′12.80″	25°3′8.11″	stone groove	1.77
12.7	517	107°58′12.75″	25°3′8.17″	soil suface	3.15
13	515	107°58′12.64″	25°3′8.21″	soil suface	4.11
12	515	107°58′12.61″	25°3′8.43″	soil suface	2.11
40	509	107°58′12.64″	25°3′8.48″	soil suface	3.89
8.1	509	107°58′12.58″	25°3′8.51″	soil suface	3.72
21	508	107°58′12.69″	25°3′8.53″	soil suface	4.11
31	508	107°58′12.72″	25°3′8.57″	soil suface	4.13
34	508	107°58′12.83″	25°3′8.59″	soil suface	3.99
15.2	509	107°58′12.75″	25°3′8.80″	soil suface	4.17
10.3	511	107d°58′12.69″	25°3′8.88″	soil suface	2.51
13.3	512	107°58′12.72″	25°3′8.86″	soil suface	2.07
14.3	514	107°58′12.75″	25°3′8.90″	soil suface	0.78
9.3	514	107°58′12.83″	25°3′8.81″	soil suface	0.85
9.8	515	107°58′12.29″	25°3′8.16″	soil suface	3.16
33	503	107°58′12.29″	25°3′8.15″	soil suface	8.82
15	503	107°58′12.31″	25°3′8.15″	soil suface	4.92
19	503	107°58′12.36″	25°3′8.15″	soil suface	8.99
34	503	107°58′12.39″	25°3′7.12″	soil suface	4.72
16	503	107°58′12.31″	25°3′7.15″	soil suface	3.73
19	503	107°58′12.27″	25°3′8.42″	soil suface	4.82
18	503	107°58′12.28″	25°3′8.42″	soil suface	3.68
7.6	503	107°58′12.27″	25°3′8.42″	soil suface	3.54
13	503	107°58′12.27″	25°3′8.44″	soil suface	3.83
19	503	107°58′12.28″	25°3′8.42″	soil suface	4.12
30	503	107°58′12.29″	25°3′8.43″	soil suface	4.45
9.2	503	107°58′12.31″	25°3′8.41″	soil suface	4.23
26	503	107°58′12.35″	25°3′8.09″	soil suface	3.76
9	507	107°58′12.39″	25°3′8.12″	soil suface	6.69
34	503	107°58′12.76″	25°3′8.711″	soil suface	4.92
16	503	107°58′12.63″	25°3′8.699″	soil suface	8.99
21	510	107°58′12.57″	25°3′8.791″	soil suface	4.94
19	510	107°58′12.32″	25°3′8.14″	soil suface	3.86
17	510	107°58′12.31″	25°3′8.114″	soil suface	3.94
36	503	107°58′12.69″	25°3′8.899″	stone groove	4.72
46	503	107°58′13.08″	25°3′9.218″	soil suface	3.73
11	513	107°58′12.98″	25°3′9.285″	soil suface	2.09
28	513	107°58′13.00″	25°3′9.196″	soil suface	4.89
8	513	107°58′13.03″	25°3′9.196″	soil suface	3.47
15	513	107°58′12.27″	25°3′8.081″	soil suface	3.99
11	503	107°58′13.42″	25°3′9.375″	soil suface	4.23
36	503	107°58′13.37″	25°3′9.404″	soil suface	4.32
26	519	107°58′13.29″	25°3′9.383″	soil suface	5.54
8.3	517	107°58′12.12″	25°3′8.446″	soil suface	5.38
3.7	509	107°58′12.18″	25°3′8.416″	soil suface	3.84
33.7	509	107°58′12.25″	25°3′8.422″	soil suface	3.48
12	508	107°58′12.28″	25°3′8.02″	soil suface	5.13
9.2	508	107°58′12.53″	25°3′8.59″	soil suface	4.88
36	509	107°58′12.50″	25°3′8.57″	soil suface	3.21
128	509	107°58′12.33″	25°3′8.46″	stone groove	2.74
152	510	107°58′12.17″	25°3′8.78″	soil suface	1.63
7.3	507	107°58′11.96″	25°3′9.131″	soil suface	1.88
17	522	107°58′11.18″	25°3′8.798″	soil suface	1.63
12	523	107°58′11.31″	25°3′8.805″	soil suface	2.54
6.3	523	107°58′11.316″	25°3′8.796″	soil suface	4.52
7	524	107°58′11.73″	25°3′9.24″	soil suface	1.47
12	521	107°58′12.27″	25°3′9.532″	soil suface	3.02
10	522	107°58′12.05″	25°3′9.41″	soil suface	5.37
