# Supplementary material for: Effects of microhabitat on rodent-mediated seed removal of endangered Kmeria septentrionalis in the karst habitat
Source: PeerJ. 2020 Nov 16;8:e10378. doi: 10.7717/peerj.10378 (PMC7676351; doi:10.7717/peerj.10378)
Supplement: Supplemental Information 2 [file peerj-08-10378-s002.xlsx]

## Sheet: Sheet1
		Fresh seed	Black seed	Exposed seed			Fresh seed	Black seed	Exposed seed			Fresh seed	Black seed	Exposed seed			Fresh seed	Black seed	Exposed seed			Fresh seed	Black seed	Exposed seed			Fresh seed	Black seed	Exposed seed			Fresh seed	Black seed	Exposed seed
1d	stone cavern	0.633333	0.9	0.866667		stone cavern	1	1	1		stone cavern	0.533333	1	1		stone cavern	0.133333	1	0.966667		stone cavern	0	0.766667	1		stone cavern	0.166667	1	1		stone cavern	0.166667	1	1
1d	stone groove	0.2	0.3	0.966667		stone groove	0	1	1		stone groove	1	1	1		stone groove	0.266667	0.966667	1		stone groove	0.0333333	0.866667	1		stone groove	0	1	1		stone groove	0.6	1	1
1d	stone surface	0.366667	0.966667	1		stone surface	1	1	1		stone surface	0.533333	1	0.7		stone surface	0.233333	0.966667	0.966667		stone surface	0	0.866667	1		stone surface	0	0.966667	0.966667		stone surface	0.8	1	1
1d	soil surface	0.333333	0	1		soil surface	0.966667	1	1		soil surface	0	0.633333	0.5		soil surface	0	1	1		soil surface	0	0.466667	1		soil surface	0	1	1		soil surface	0.6	0.866667	0.933333
		Fresh seed	Black seed	Exposed seed			Fresh seed	Black seed	Exposed seed			Fresh seed	Black seed	Exposed seed			Fresh seed	Black seed	Exposed seed			Fresh seed	Black seed	Exposed seed			Fresh seed	Black seed	Exposed seed			Fresh seed	Black seed	Exposed seed
2d	stone cavern	0	0	0.5		stone cavern	1	1	1		stone cavern	0	0.9	0.933333		stone cavern	0.533333	1	0.966667		stone cavern	0.0333333	1	1		stone cavern	0.966667	1	1		stone cavern	0	0	0.0333333
2d	stone groove	0.0333333	0.266667	0.866667		stone groove	0.466667	1	1		stone groove	0	0.466667	1		stone groove	0.333333	1	1		stone groove	0.133333	1	1		stone groove	0.466667	1	0.933333		stone groove	1	1	1
2d	stone surface	0	0.666667	1		stone surface	0.2	1	1		stone surface	0	0.633333	1		stone surface	0.133333	1	1		stone surface	0.0333333	1	1		stone surface	0.8	1	1		stone surface	0.7	1	1
2d	soil surface	0	0.966667	1		soil surface	0.366667	1	1		soil surface	0	0	0.866667		soil surface	0.0666667	1	1		soil surface	0.0666667	1	1		soil surface	0.233333	1	1		soil surface	1	1	1
		Fresh seed	Black seed	Exposed seed			Fresh seed	Black seed	Exposed seed			Fresh seed	Black seed	Exposed seed			Fresh seed	Black seed	Exposed seed			Fresh seed	Black seed	Exposed seed			Fresh seed	Black seed	Exposed seed			Fresh seed	Black seed	Exposed seed
3d	stone cavern	0	0.766667	0.933333		stone cavern	0.0666667	1	0.933333		stone cavern	0	0.0666667	1		stone cavern	0.0666667	1	1		stone cavern	0.433333	1	1		stone cavern	1	1	1		stone cavern	0.966667	0.9	0.966667
3d	stone groove	0	0.533333	0.933333		stone groove	0.4	1	1		stone groove	0	0.666667	1		stone groove	0.566667	1	1		stone groove	0.0666667	1	1		stone groove	0.7	0.933333	0.966667		stone groove	0.8	1	1
3d	stone surface	0	1	1		stone surface	0.0666667	1	1		stone surface	0.366667	0.966667	0.966667		stone surface	0.933333	1	1		stone surface	0.9	1	1		stone surface	0.966667	1	1		stone surface	1	0.966667	1
3d	soil surface	0	0.133333	0.966667		soil surface	0.0333333	0.966667	0.966667		soil surface	0	0.633333	1		soil surface	0.0333333	1	1		soil surface	0.5	1	1		soil surface	1	1	1		soil surface	0.9	1	1
		Fresh seed	Black seed	Exposed seed			Fresh seed	Black seed	Exposed seed			Fresh seed	Black seed	Exposed seed			Fresh seed	Black seed	Exposed seed			Fresh seed	Black seed	Exposed seed			Fresh seed	Black seed	Exposed seed			Fresh seed	Black seed	Exposed seed
4d	stone cavern	0	0	0.733333		stone cavern	0.533333	0	0.0333333		stone cavern	0	0.133333	1		stone cavern	0.933333	0.9	1		stone cavern	0.133333	0.966667	1		stone cavern	0.133333	0.0333333	0		stone cavern	0.933333	0	0.0666667
4d	stone groove	0	0.1	0		stone groove	0.0333333	1	1		stone groove	0.0333333	0.0333333	0.733333		stone groove	0.833333	0.966667	1		stone groove	0	0	0		stone groove	0	0	0		stone groove	0.6	0	0
4d	stone surface	0	0	0.1		stone surface	0.0333333	0	0.933333		stone surface	0.3	1	1		stone surface	0	0	0		stone surface	0	0	0		stone surface	0	0.8	0		stone surface	0.933333	0	0
4d	soil surface	0	0.0666667	0		soil surface	0.3	0.2	1		soil surface	0.233333	0.3	0.966667		soil surface	0	0.0666667	0.0666667		soil surface	0	0.0333333	0.1		soil surface	0.0333333	0.9	0.233333		soil surface	0.966667	0.0333333	0.0333333
		Fresh seed	Black seed	Exposed seed			Fresh seed	Black seed	Exposed seed			Fresh seed	Black seed	Exposed seed			Fresh seed	Black seed	Exposed seed			Fresh seed	Black seed	Exposed seed			Fresh seed	Black seed	Exposed seed			Fresh seed	Black seed	Exposed seed
5d	stone cavern	0.333333	0	0.733333		stone cavern	0.933333	1	1		stone cavern	0.1	0.233333	0.9		stone cavern	0.566667	1	1		stone cavern	0.333333	0.933333	1		stone cavern	0.5	1	1		stone cavern	0.0666667	0.8	0.933333
5d	stone groove	0.966667	0.1	0		stone groove	0.0666667	0.633333	1		stone groove	0	0.166667	0.866667		stone groove	0.666667	1	1		stone groove	0	0	0		stone groove	0	0.0333333	0		stone groove	0	0	0.1
5d	stone surface	1	0	0.1		stone surface	0.133333	0.333333	0.933333		stone surface	0.0666667	0.9	0.933333		stone surface	0.0666667	0.733333	1		stone surface	0	0	0.733333		stone surface	0	0	0		stone surface	0	0.266667	0.1
5d	soil surface	1	0.0666667	0		soil surface	0.166667	0.733333	0.933333		soil surface	0.0333333	0.666667	0.933333		soil surface	0.0666667	0.866667	0.966667		soil surface	0	0	0		soil surface	0.0333333	0.0666667	0.0333333		soil surface	0	0.733333	0.333333
		Fresh seed	Black seed	Exposed seed			Fresh seed	Black seed	Exposed seed			Fresh seed	Black seed	Exposed seed			Fresh seed	Black seed	Exposed seed			Fresh seed	Black seed	Exposed seed			Fresh seed	Black seed	Exposed seed			Fresh seed	Black seed	Exposed seed
6d	stone cavern	0.466667	0.933333	1		stone cavern	0.7	1	1		stone cavern	0.166667	0.966667	0.2		stone cavern	1	1	1		stone cavern	0.766667	1	1		stone cavern	0.6	0.966667	0.633333		stone cavern	0.333333	1	0.966667
6d	stone groove	0.133333	0	1		stone groove	0.9	0.9	0.966667		stone groove	0.166667	0.766667	1		stone groove	0.2	0.966667	1		stone groove	0.2	0.1	0.2		stone groove	0.633333	0.433333	0.933333		stone groove	0.166667	0.833333	1
6d	stone surface	0.166667	0.266667	1		stone surface	0.4	1	1		stone surface	0.566667	0.933333	0.966667		stone surface	0.666667	1	1		stone surface	0.333333	0.5	0.933333		stone surface	0.233333	0.366667	1		stone surface	0.133333	0.666667	0.2
6d	soil surface	0.266667	0.266667	0.966667		soil surface	0.666667	1	1		soil surface	0.633333	0.966667	1		soil surface	0.3	0.966667	0.933333		soil surface	0.1	0.333333	1		soil surface	0.166667	0.4	1		soil surface	0.0333333	0.933333	1
		Fresh seed	Black seed	Exposed seed			Fresh seed	Black seed	Exposed seed			Fresh seed	Black seed	Exposed seed			Fresh seed	Black seed	Exposed seed			Fresh seed	Black seed	Exposed seed			Fresh seed	Black seed	Exposed seed			Fresh seed	Black seed	Exposed seed
7d	stone cavern	0	1	1		stone cavern	0.7	1	0.933333		stone cavern	0.433333	1	1		stone cavern	0.966667	0.966667	1		stone cavern	0.0333333	1	1		stone cavern	0	1	0.966667		stone cavern	0	0.933333	0.966667
7d	stone groove	0.0666667	0.0666667	0.4		stone groove	0.0666667	0.766667	0.933333		stone groove	0.166667	1	0.966667		stone groove	0.5	0.966667	0.966667		stone groove	0	0.566667	0.933333		stone groove	0.166667	0.9	0.266667		stone groove	0	0.3	0.233333
7d	stone surface	0	0.566667	0.866667		stone surface	0.166667	0.9	0.966667		stone surface	0.3	1	1		stone surface	0.866667	1	1		stone surface	0.0666667	1	0.733333		stone surface	0	0.166667	0		stone surface	0.0333333	0.6	0.166667
7d	soil surface	0	0.0666667	0		soil surface	0.4	0.866667	0.933333		soil surface	0.9	1	1		soil surface	0.266667	0.933333	0.9		soil surface	0	0.933333	0.333333		soil surface	0	0.166667	0.233333		soil surface	0.0333333	0.7	0.966667
		Fresh seed	Black seed	Exposed seed			Fresh seed	Black seed	Exposed seed			Fresh seed	Black seed	Exposed seed			Fresh seed	Black seed	Exposed seed			Fresh seed	Black seed	Exposed seed			Fresh seed	Black seed	Exposed seed			Fresh seed	Black seed	Exposed seed
8d	stone cavern	0.933333	1	1		stone cavern	0.966667	0.966667	0.966667		stone cavern	0.0333333	1	1		stone cavern	0.9	1	0.966667		stone cavern	0	1	1		stone cavern	0	1	1		stone cavern	0	1	0.933333
8d	stone groove	0	0.2	0.533333		stone groove	0.266667	0.833333	1		stone groove	0.0333333	1	1		stone groove	1	0.966667	1		stone groove	0	0.133333	0.233333		stone groove	0	0.966667	0.966667		stone groove	0	0	0.5
8d	stone surface	0.1	0.633333	0.9		stone surface	0.133333	0.9	0.966667		stone surface	0.0333333	0.966667	1		stone surface	0.866667	0.933333	1		stone surface	0.133333	1	1		stone surface	0	0.1	0.133333		stone surface	0	0.9	1
8d	soil surface	0	0	0		soil surface	0.466667	0.766667	0.933333		soil surface	0.366667	1	0.966667		soil surface	0.866667	1	1		soil surface	0.133333	0.2	0		soil surface	0	0	0.166667		soil surface	0.1	0.333333	0.466667
		Fresh seed	Black seed	Exposed seed			Fresh seed	Black seed	Exposed seed			Fresh seed	Black seed	Exposed seed			Fresh seed	Black seed	Exposed seed			Fresh seed	Black seed	Exposed seed			Fresh seed	Black seed	Exposed seed			Fresh seed	Black seed	Exposed seed
9d	stone cavern	0.966667	1	1		stone cavern	1	1	0.966667		stone cavern	1	1	0.966667		stone cavern	0.966667	1	1		stone cavern	0	0	0.1		stone cavern	0	0	0		stone cavern	0.866667	0.1	0.166667
9d	stone groove	0.2	0.966667	0.566667		stone groove	0.966667	0.933333	0.966667		stone groove	0	1	1		stone groove	1	1	1		stone groove	0	0.0333333	0		stone groove	0.0666667	0.566667	1		stone groove	0	0.2	0
9d	stone surface	0.866667	0.9	1		stone surface	0.966667	0.933333	1		stone surface	0.966667	0.933333	1		stone surface	1	1	1		stone surface	0	0	0		stone surface	0.0333333	0	0.1		stone surface	0.0666667	0	0
9d	soil surface	0	0.0333333	0.2		soil surface	1	0.833333	0.966667		soil surface	0.933333	1	1		soil surface	0.966667	1	1		soil surface	0	0	0.466667		soil surface	0	0	0.133333		soil surface	0	0	0
		Fresh seed	Black seed	Exposed seed			Fresh seed	Black seed	Exposed seed			Fresh seed	Black seed	Exposed seed			Fresh seed	Black seed	Exposed seed			Fresh seed	Black seed	Exposed seed			Fresh seed	Black seed	Exposed seed			Fresh seed	Black seed	Exposed seed
10d	stone cavern	0.1	0.866667	0.733333		stone cavern	0.666667	1	1		stone cavern	0.933333	0.933333	0.966667		stone cavern	0.933333	0.9	1		stone cavern	0.833333	1	0.7		stone cavern	0.9	1	0.933333		stone cavern	0.966667	0.366667	0.3
10d	stone groove	0.0666667	0.1	0.3		stone groove	1	0.966667	1		stone groove	0.333333	0.966667	1		stone groove	0.833333	0.933333	1		stone groove	0.9	0.733333	1		stone groove	1	0.8	1		stone groove	0.266667	0.9	0.966667
10d	stone surface	0.0333333	0.1	0.566667		stone surface	0.666667	0.966667	1		stone surface	1	1	1		stone surface	0.8	0.933333	1		stone surface	0.966667	0.933333	0.3		stone surface	1	1	0.7		stone surface	0.4	0.833333	0.666667
10d	soil surface	0	0.133333	0.133333		soil surface	0.166667	1	0.933333		soil surface	0.933333	1	0.933333		soil surface	0.866667	0.8	0.9		soil surface	0.933333	0.833333	0.7		soil surface	0.533333	0.833333	0.6		soil surface	0.9	0.8	0.233333
